# Supplementary material
Source: PubMed Central journal article supplement (PMC5930313)
Supplement: AEM.02774-17_zam009188498s1.pdf [file AEM.02774-17_zam009188498s1.pdf]

**Supplemental Table S1.** Locations and sizes of fragments used in electromobility shift assays, in relation to the promoter regions' respective transcription start sites.

| Fragment Name | Fragment Start (Position) | Fragment End (Position) | Fragment Size (bp) | Number of identified inverted repeats | Shift Observed (+/-) |
|---------------|---------------------------|-------------------------|--------------------|---------------------------------------|----------------------|
| IntP1a        | -174                      | +74                     | 249                | 2                                     | ++                   |
| IntP1b        | -89                       | +173                    | 263                | 2*                                    | +                    |
| IntP1c        | +5                        | +258                    | 254                | 0                                     | -                    |
| IntSa         | -132                      | +159                    | 292                | 2                                     | ++                   |
| LntSb         | -56                       | +252                    | 309                | 2*                                    | +                    |
| IntSc         | +30                       | +337                    | 308                | 0                                     | -                    |
| nahSa         | -197                      | +90                     | 288                | 1                                     | +                    |
| nahSb         | -91                       | +211                    | 303                | 1                                     | +                    |
| nahSfc        | +4                        | +289                    | 286                | 0                                     | -                    |
| nahAa         | -206                      | +95                     | 302                | 1                                     | +                    |
| nahAb         | -70                       | +226                    | 297                | 0                                     | -                    |
| nahAc         | +11                       | +310                    | 300                | 0                                     | -                    |
| nagB3a        | -176                      | +175                    | 352                | 2                                     | ++                   |
| nagB3b        | -84                       | +338                    | 423                | 2*                                    | +                    |
| nagB3c        | -22                       | +338                    | 361                | 1                                     | +                    |
| nagB3d        | +94                       | +338                    | 245                | 0                                     | -                    |
| nagKa         | -283                      | +49                     | 333                | 1                                     | +                    |
| nagKb         | -283                      | -59                     | 225                | 0                                     | -                    |
| lnpBa         | -227                      | +93                     | 321                | 1                                     | +                    |
| lnpBb         | +4                        | +262                    | 259                | 0                                     | -                    |
| lnpBc         | -91                       | +262                    | 354                | 1                                     | +                    |
| gltAa         | -419                      | +83                     | 503                | 1                                     | +                    |
| gltAb         | -304                      | +205                    | 510                | 1                                     | +                    |
| gltAc         | -59                       | +205                    | 265                | 1                                     | +                    |

Binding of the amplified DNA fragment by the regulator protein, and thus formation of a DNA-protein complex is observed as a shift in band position in the EMSA gel.

A positive result for a band shift is represented by a '+'. A double-shift is represented by a '++'. No observed shift is represented by a '-'.

Fragment positions are given in relation to the deduced transcription start site (0).

'\*' indicates that one of the identified inverted repeat sequences is partially interrupted by or in close proximity to the terminus of the fragment.

**Supplemental Table S2.** Predicted operator sequence used for the *in silico* generation of operator sequence motif consensuses.

| <b>Regulator</b> | <b>Operator Name</b> | <b>Sequence</b>         |
|------------------|----------------------|-------------------------|
| <b>LntR</b>      | lntP1ir1             | tgtttcgtgacca           |
|                  | lntP1ir2             | tgataacgtaaaca          |
|                  | lntS1ir1             | tgtagcgataaca           |
|                  | lntS1ir2             | tgttatcgcaacca          |
| <b>NahR</b>      | nahSir1              | cataatcatg              |
|                  | nahAir1              | catcacgatg              |
| <b>NagR1</b>     | nagB3ir1             | aattgtaagtagtattaacaaat |
|                  | nagB3ir2             | atctgtaggaactcactaat    |
|                  | nagKir1              | attgtaagatagttgcaata    |
|                  | lnpBir1              | ttatgtatataacttaacaaat  |
|                  | gltAir1              | aattgtagtaggtgacaata    |
|                  | gltAir2 <sup>A</sup> | cttgtgaaggagtattaataaaa |

<sup>A</sup>Not identified by EMSA analysis.

(a) (I)

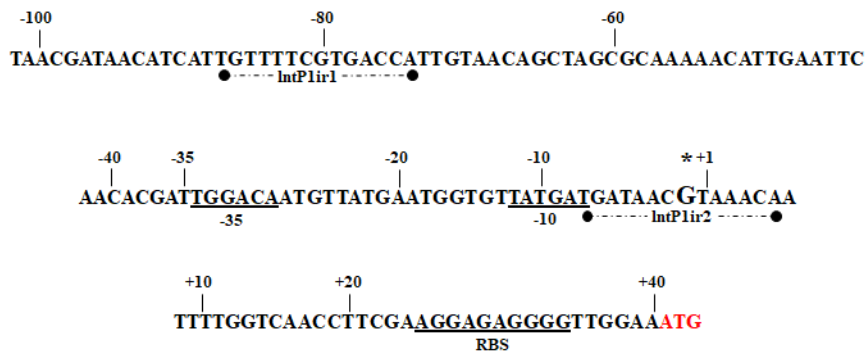

(II)

*IntP1* (Bbr\_0527)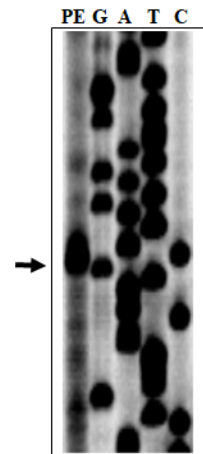

(b) (I)

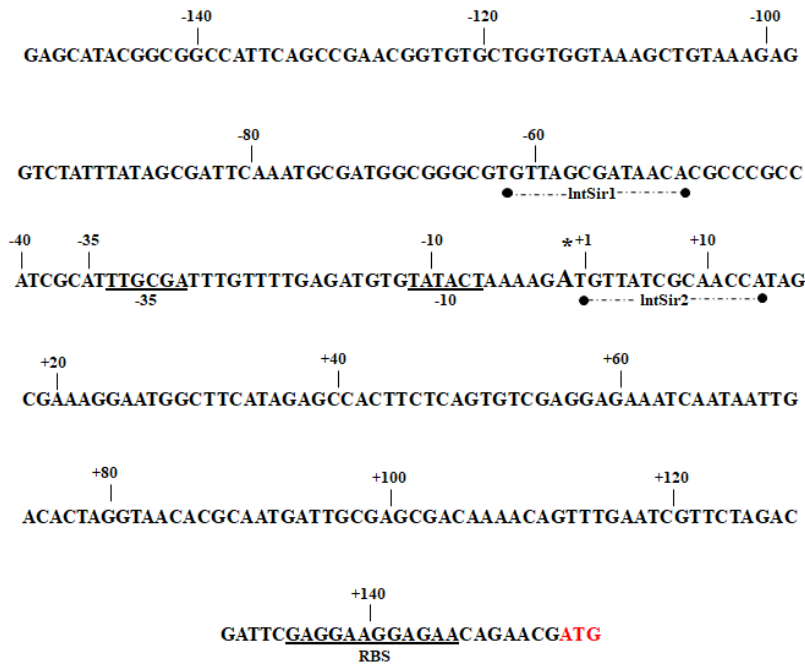

(II)

*IntS* (Bbr\_0530)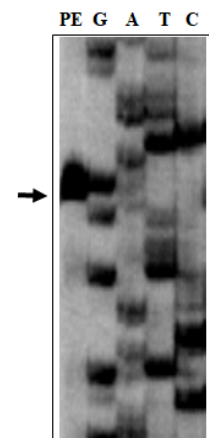

**Supplemental Figure S1.** Schematic representations (I) of the *IntP1* (a) and *IntS* (b) promoter regions for the binding of LntR. Underlining indicates the 10 and 35 hexamers, and ribosome binding sites deduced from the primer extension results; experimentally determined transcriptional start sites (TSS) are indicated by asterisks. The dashed lines under sequences with names in boldface indicate the inverted-repeat IntP1ir1, IntP1ir2, IntSir1 and IntSir2 binding sequences displayed above the lollipop. The arrows in the right panels (II) indicate the primer extension products.

(c) (I)

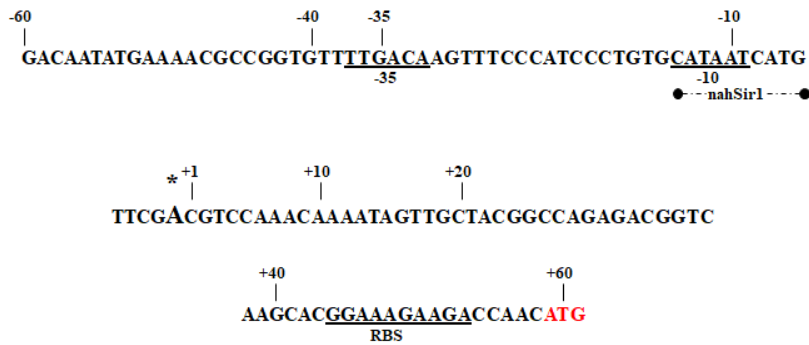

(II)

*nahS* (Bbr\_1554)

PE G A T C

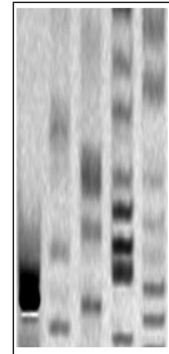

(d) (I)

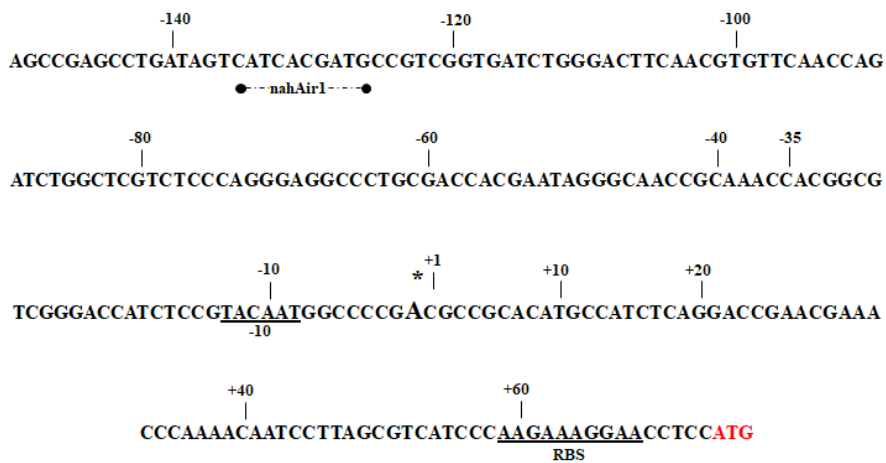

(II)

*nahA* (Bbr\_1556)

PE G A T C

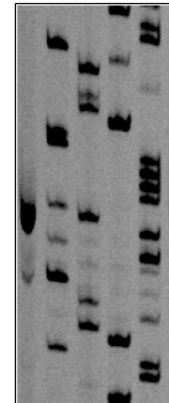

**Supplemental Figure S1.** Schematic representations (I) of the *nahS* (c) and *nahA* (d) promoter regions for the binding of NahR. Underlining indicates the 10 and 35 hexamers, and ribosome binding sites deduced from the primer extension results; experimentally determined transcriptional start sites (TSS) are indicated by asterisks. The dashed lines under sequences with names in boldface indicate the inverted-repeat *nahSir1* and *nahAir1* binding sequences displayed above the lollipop. The arrows in the right panels (II) indicate the primer extension products.

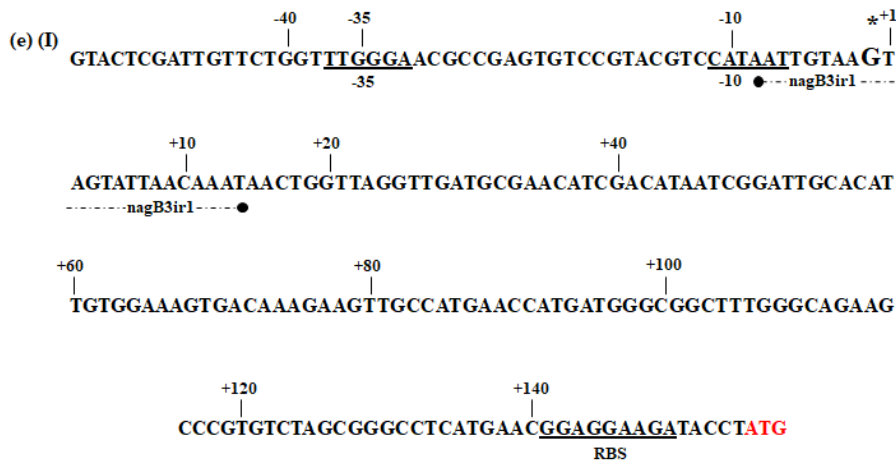

(II)  
*nagB3* (Bbr\_1248)

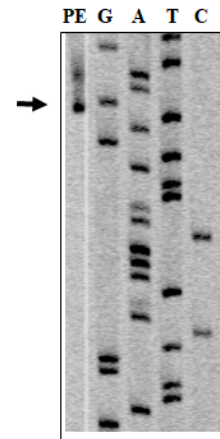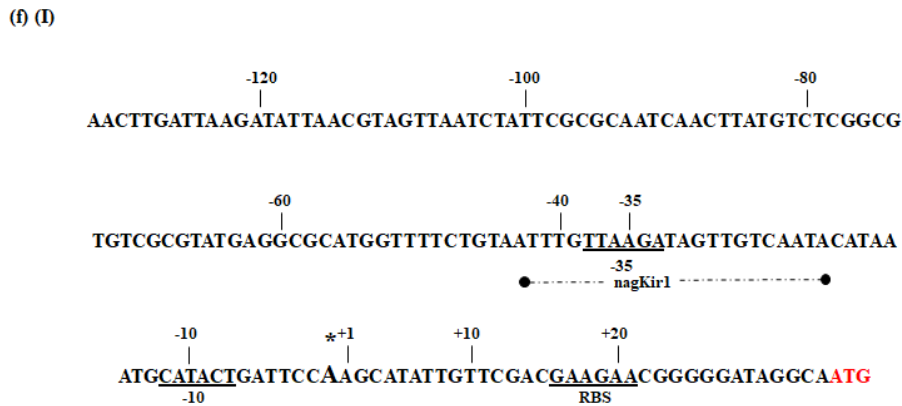

(II)  
*nagK* (Bbr\_1250)

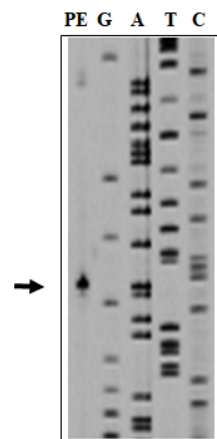

**Supplemental Figure S1.** Schematic representations (I) of the *nagB3* (e) and *nagK* (f) promoter regions for the binding of NagR1. Underlining indicates the 10 and 35 hexamers, and ribosome binding sites deduced from the primer extension results; experimentally determined transcriptional start sites (TSS) are indicated by asterisks. The dashed lines under sequences with names in boldface indicate the inverted-repeat nagB3ir1 and nagKir1 binding sequences displayed above the lollipops. The arrows in the right panels (II) indicate the primer extension products.

(g) (I)

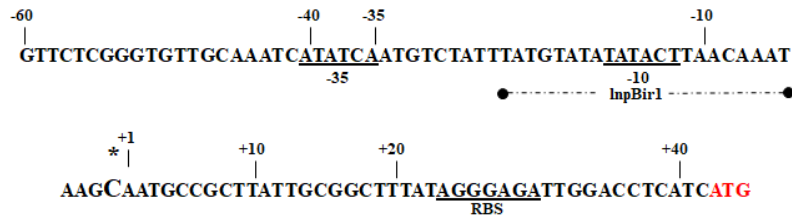

(II)

*lnpB* (Bbr\_1586)

PE G A T C

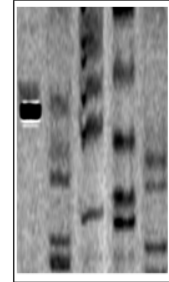

(h) (I)

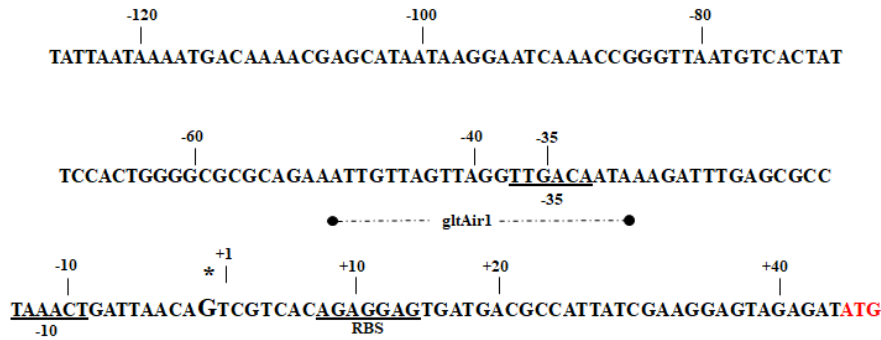

(II)

*gltA* (Bbr\_1590)

PE G A T C

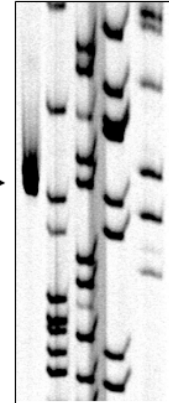

**Supplemental Figure S1.** Schematic representation (I) of the *lnpB* (g) and *gltA* (h) promoter regions for the binding of NagR1. Underlining indicates the 10 and 35 hexamers, and ribosome binding sites deduced from the primer extension results; experimentally determined transcriptional start sites (TSS) are indicated by asterisks. The dashed lines under sequences with names in boldface indicate the inverted-repeat *lnpBir1* and *gltAir1* binding sequences displayed above the lollipops. The arrows in the right panels (II) indicate the primer extension products.

(a)

*IntP1a*

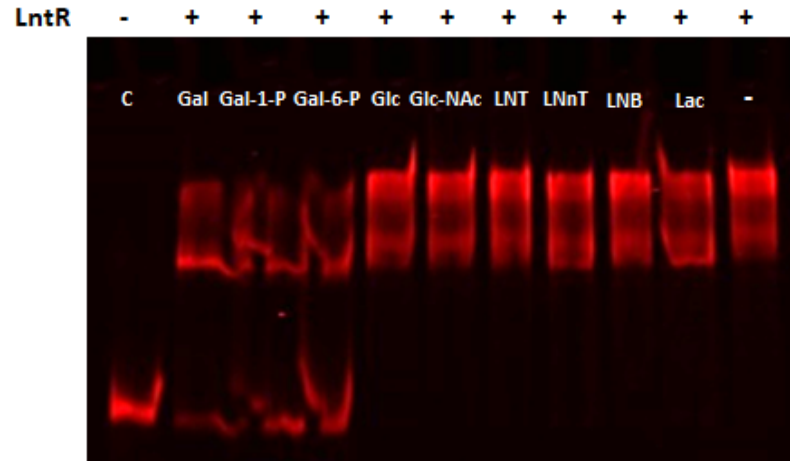

**Supplemental Figure S2.** EMSA images showing (a) LntR interactions with promoter-containing DNA fragment *IntP1a*, with the addition of a range of potential carbohydrate inducers, at a concentration of 20mM. In each panel, 'C' indicates a negative control, where an equivalent amount crude cell extract from NZ9000 harbouring empty pNZ8150 was added instead of crude extract from the regulator-expressing NZ9000 strain.

(b)

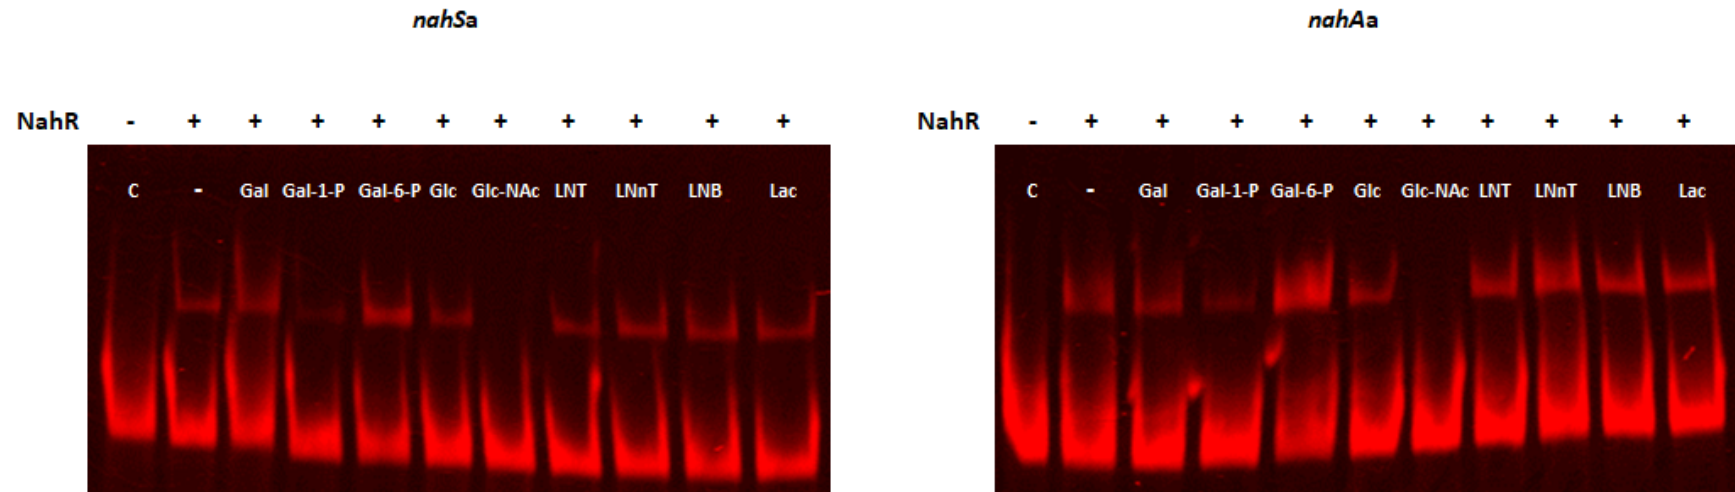

**Supplemental Figure S2.** EMSA images (b) NahR interactions with promoter-containing DNA fragments *nahSa* and *nahAa*, with the addition of a range of potential carbohydrate inducers, at a concentration of 20mM. In each panel, 'C' indicates a negative control, where an equivalent amount crude cell extract from NZ9000 harbouring empty pNZ8150 was added instead of crude extract from the regulator-expressing NZ9000 strain.



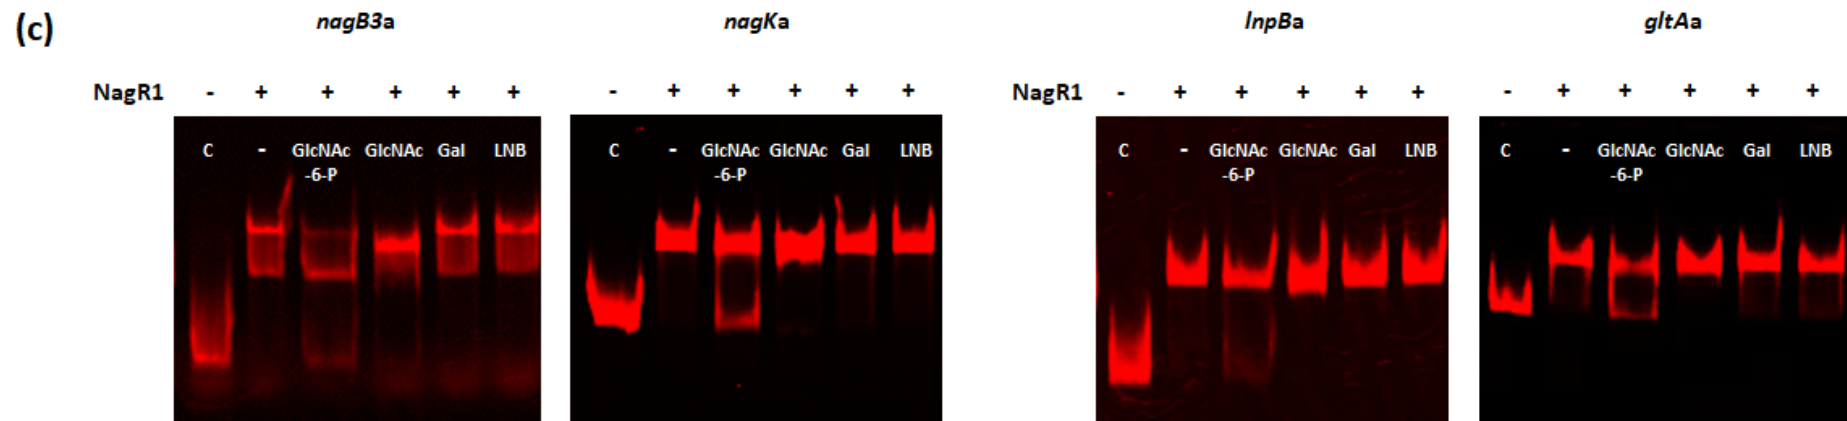

**Supplemental Figure S2.** EMSA images showing (c) NagR1 interactions with promoter-containing DNA fragments *nagB3a*, *nagKa*, *InpBa* and *gltAa*, with the addition of a range of potential carbohydrate inducers, at a concentration of 20mM. In each panel, 'C' indicates a negative control, where an equivalent amount crude cell extract from NZ9000 harbouring empty pNZ8150 was added instead of crude extract from the regulator-expressing NZ9000 strain.

(a)

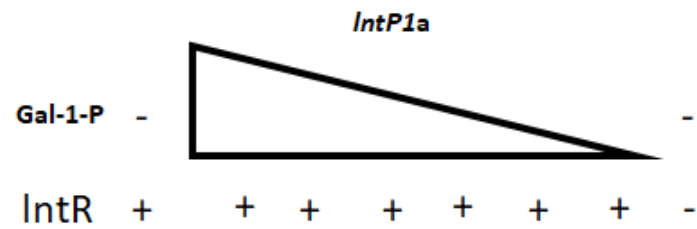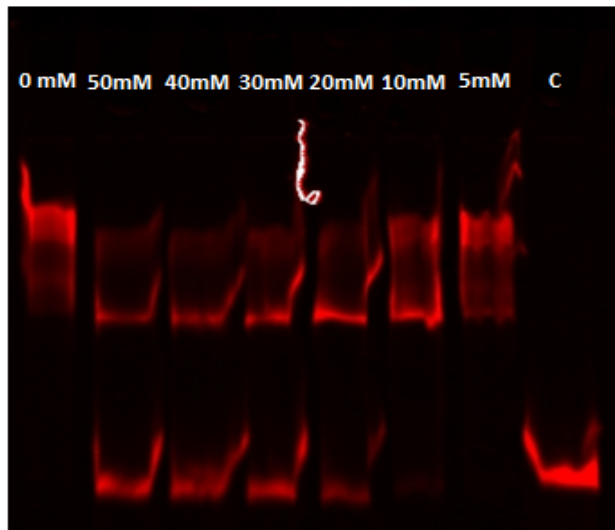

(b)

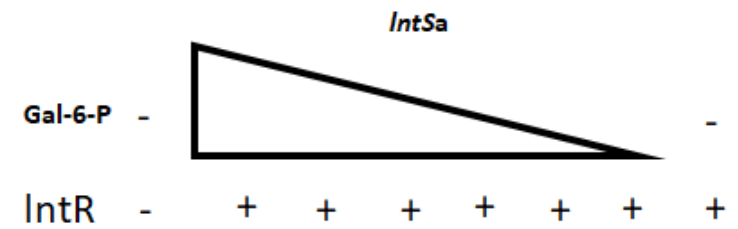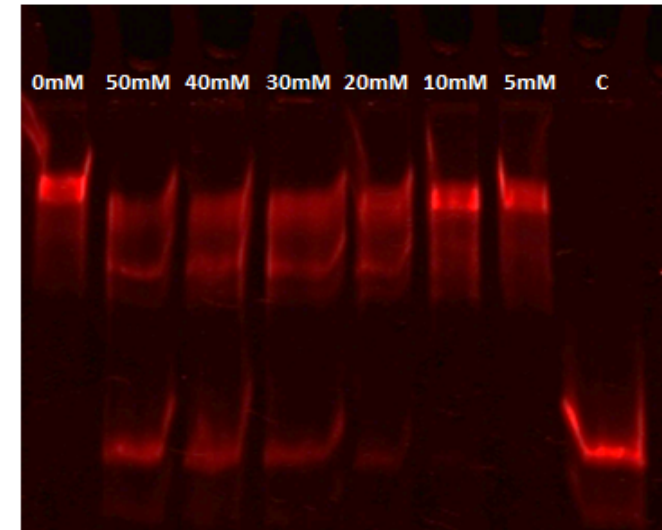

**Supplemental Figure S3.** EMSA images showing LntR interactions with promoter-containing DNA fragments, with the addition of a gradient (a) Gal-1-P and (b) Gal-6-P, ranging from 0mM-50mM. In each panel, 'C' indicates a negative control, where an equivalent amount crude cell extract from NZ9000 harbouring empty pNZ8150 was added instead of crude extract from the regulator-expressing NZ9000 strain.
